# Supplementary material for: The ABA/LANCL1/2 Hormone/Receptor System Controls Adipocyte Browning and Energy Expenditure
Source: MDPI journal article supplement (doi:10.3390/ijms24043489), 2023-02-09
Supplement: s1 [file s1]

## Supplementary data

**Table S1.** Primer sequences used to amplify mouse target genes.

| Mouse genes | Accession N. | Forward Primer 5'-3'   | Reverse Primer 5'-3'      |
|-------------|--------------|------------------------|---------------------------|
| Hprt1       | NM_013556    | CCCTGGTTAAGCATACAGCCCC | AGTCTGGCCTGTATCCAACACTTCG |
| Lanc1       | NM_001190985 | GAGGGCCTTTCCGAATCCTT   | GGAGTCAGCCTCCCAGTAGA      |
| MT-DNA      | AP014941     | CCGTCACCCTCCTCAAATTA   | GGGCTAGGATTAGTTCAGAGTG    |
| ND1         | AP014941     | CCACGCTTCCGTTACGATCA   | GTATGGTGGTACTCCCGCTG      |
| Adrb3       | NM_013462    | TCCCAGCGGAGTTTTCATCG   | GCTACACAGAAGACGACGGA      |
| Thra        | NM_001313983 | ACCACCGCAAACACAACATT   | TCGAACTCTGCACTTCTCTCTC    |
| Thrb        | NM_001113417 | ATCTCAAGTGCCCAGACTTTCC | TTTGTCCCCACACACTACACA     |
| Estrra      | U85259       | CCCTGACAGTCCAAAGGGTT   | CATCCTCCTCCTCCTTGTGC      |

**Table S2.** Primer sequences used to amplify human target genes.

| Human genes | Accession N° | Forward Primer 5'-3'   | Reverse Primer 5'-3'    |
|-------------|--------------|------------------------|-------------------------|
| Ucp1        | NM_021833    | GTGTGCCCAACTGTGCAATG   | GTTCCAGGATCCAAGTCGCA    |
| Ucp3        | NM_022803    | ATACAGCGGGACTATGGACG   | ACCTCAGCACAGTTGACGAT    |
| ESRRA       | NM_004451    | TATGGTGTGGCATCCTGTGAG  | GGACAGCTGTACTCGATGCT    |
| DIO2        | AF188709     | CTCTATGACTCGGTCATTCTGC | TGTCACCTCCTTCTGTACTGG   |
| Slc2a4      | NM_001042    | AATGCTGCTGCCTCCTATG    | ATCAGAATGCCGATAACAATGG  |
| PPARG       | NM_138712    | CGAAGACATTCCATTCACAAG  | CTCCACAGACACGACATTC     |
| CPT1B       | NM_004377    | AAACAGTGCCAGGCGGTC     | CGTCTGCCAACGCCTTG       |
| CIDEA       | NM_001279    | AGGCAGGTTACGTGTGGATA   | GAAACACAGTGTTTGGCTCAAGA |
| MT-DNA      | AY665667     | CCCACCCAAGAACAGGGTTT   | TAGGAGGTTGGCCATGGGT     |

|          |              |                          |                          |
|----------|--------------|--------------------------|--------------------------|
| MPC1     | NM_001376568 | CCTCGGAAGTGGCTTCTGTT     | CTCGTGTTTGATAAGCCGCC     |
| PDHA1    | NM_001173456 | ATGGATATCCTGTGCGTCCG     | GTGTCCGTGGTAACGGTAAGT    |
| ADRB3    | NM_000025    | CCTCCAACATGCCCTACGTG     | CGTAGACGAAGAGCATCACGA    |
| c-erbA-1 | X55005       | ATGACACGGAAGTGGCTCTG     | AGGTACGCCTCCTGACTCTT     |
| THRB     | NM_000461    | AGCCACTGGAAGCAAAAACG     | CTTCCACCTTCTGGGGCAT      |
| INSR     | AH002851     | CTGGGTTTCAAGCGGAGCTA     | AAGGATTGGACCGAGGCAAG     |
| Prkaa1   | NM_006251    | TACATTCTGGGTGACACGCT     | AGGCTCCGAATCTTCTGTCTG    |
| Sirt1    | AF083106     | AGGCCACGGATAGGTCCATA     | GTGGAGGTATTGTTTCCGGC     |
| Ppargc1a | NM_001330751 | CTGTGTCACCACCCAAATCCTTAT | TGTTTCGAGAAAAGGACCTTGA   |
| Lancl1   | NM_006055    | TCTCACAACGCTTGACCAATAAG  | GCCCAGCCAGTGTAACCG       |
| Lancl2   | AF353942     | AGGCGTACAAGGTCTTTAAGGAG  | GCTCGGTAGAGGTACTTCTTATCC |
| ANT1     | J04982       | TGGTCTGGGCGACTGTATCA     | ACTCCGAAGTAGGCAGCTCT     |
| Hprt1    | NM_000194    | GGTCAGGCAGTATAATCCAAAG   | TTCATTATAGTCAAGGGCATATCC |
| ND1      | AY665667     | CGATTCCGCTACGACCAACT     | GTTTGAGGGGGAATGCTGGA     |
| Lancl3   | NM_198511    | GGCGAGACCATCGAGAGAGA     | GTGTCCAGGTACTGCGGTTT     |

**Table S3.** Primary and secondary antibodies used for Western blot.

| Primary Antibody | Host   | Concentrations | Manufacturer      |
|------------------|--------|----------------|-------------------|
| Anti-LANCL1      | Rabbit | 1:250          | Novus Biologicals |
| Anti-LANCL2      | Mouse  | 1:1000         | Reference [31]    |

| Anti-AMPK tot          | Rabbit         | 1:1000 | Cell Signaling Technology, Danvers, MA       |
|------------------------|----------------|--------|----------------------------------------------|
| Anti-pAMPK<br>P-Ser473 | Rabbit         | 1:1000 | Cell Signaling Technology, Danvers, MA       |
| Anti-vinculin          | Rabbit         | 1:1000 | Cell Signaling Technology, Danvers, MA       |
| Anti-PGC-1 $\alpha$    | Mouse          | 1:1000 | Sigma-Aldrich                                |
| Secondary<br>Antibody  | Concentrations |        | Manufacturer                                 |
| Anti-Mouse             | 1:2000         |        | Santa Cruz Biotechnology Inc.,<br>California |
| Anti-Rabbit            | 1:1000         |        | Santa Cruz Biotechnology Inc.,<br>California |

**Table S4.** Differentiation protocol of human immortalized preadipocytes. To induce adipocyte differentiation TERT-hWA and TERT-hBA human preadipocytes were cultured in advanced DMEM/F12 containing 2% FBS, 2 mM L-glutamine, 62.5  $\mu$ g/ml penicillin, 100  $\mu$ g/ml streptomycin (basal medium). The following supplements were added to the basal medium with the indicated timing: insulin (5  $\mu$ g/ml), dexamethasone (1  $\mu$ M), 3-isobutyl-1-methylxanthine (IBMX) (0.5 mM), rosiglitazone (1  $\mu$ M), human cortisol (1  $\mu$ M) and T3 (1 nM). **For white and brown adipocytes, culture stops at day 12. Browning of white to “beige” adipocytes is induced by culture with rosiglitazone between days 12 and 15.**

|            | TERT-hWA                                                                 |                                | TERT-hBA          |
|------------|--------------------------------------------------------------------------|--------------------------------|-------------------|
|            | white                                                                    | “beige”                        | brown             |
| Days 0-5   | basal medium + insulin, dexamethasone, IBMX, rosiglitazone, cortisol, T3 |                                |                   |
| Days 6-12  | basal medium                                                             |                                | basal medium + T3 |
| Days 12-15 | -                                                                        | basal medium+<br>rosiglitazone | -                 |

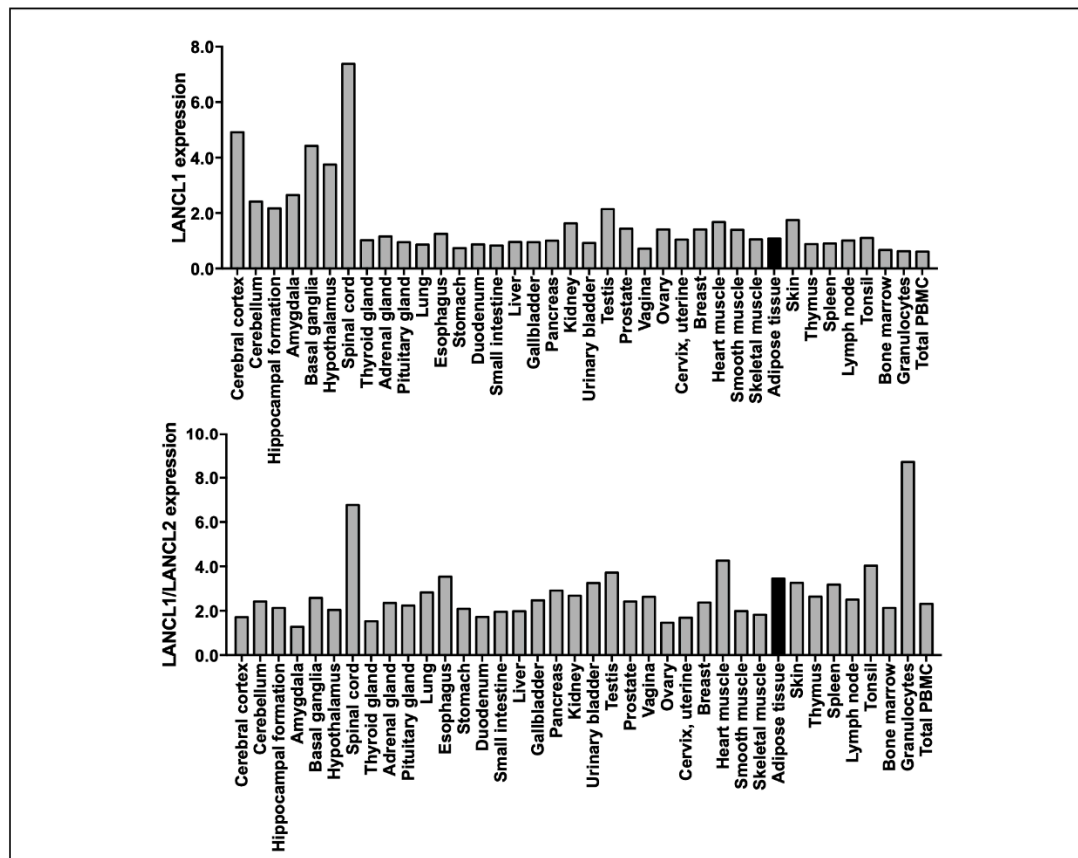

**Figure S1.** Tissue expression levels of LANCE1 and LANCE2 proteins in human tissues. The data reported are from The Human Protein Atlas portal. LANCE1 expression levels in various tissues relative to the pancreas (upper panel) and LANCE1/LANCE2 expression (lower panel) in different tissues. The mRNA expression levels in human tissue are based on RNA-seq data generated by the Human Protein Atlas, Genotype-Tissue Expression portal and CAGE data generated by the FANTOM5 consortium. Consensus normalized expression levels for human tissue is created by combining the data from these three transcriptomics datasets. Adipose tissue (AT) is indicated by a black bar; in these tissues, LANCE1 expression levels are 3-fold higher than LANCE2 expression levels.

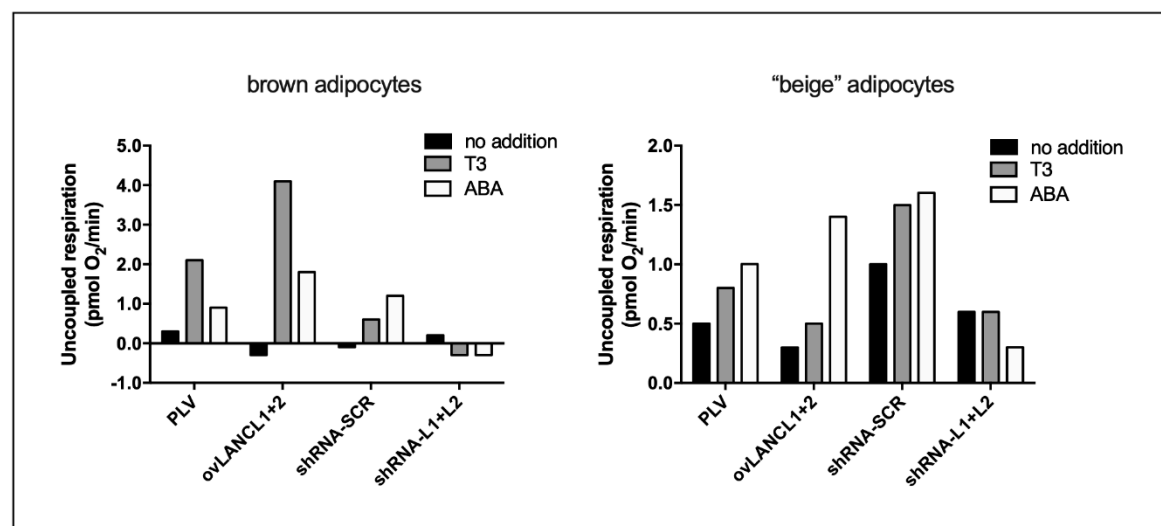

**Figure S2.** Uncoupled respiration in LANCE1/2-overexpressing and in double-silenced brown and "beige" adipocytes. Uncoupled respiration was calculated as the difference between respiration in the presence of oligomycin and after addition of rotenone/antimycin A. The mean values shown are expressed as pmol O<sub>2</sub>/min/5,000 cells and are derived from the data shown in Figure 6.
